# Supplementary material for: Efficient removal of uranium from the kidneys by a picolinate-based pentadentate chelator
Source: Royal Society of Chemistry journal article supplement (doi:10.1039/d4nj00986j), 2024-01-01
Supplement: d4nj00986j1.pdf [file d4nj00986j1.pdf]

## ***Efficient Removal of Uranium from the Kidney by a Picolinate-based Pentadentate Chelator***

Dehan Cao,<sup>†</sup> Bin Chen,<sup>†</sup> Yigong Xu, Zongyi Li, Tingfeng Sun, Sheng Hong, Tianen Zhu,  
Lei Chen, Ximeng Li, Longxiang Wang, Jiakai Liu, Yaqi Jin, Shuao Wang and Juan  
Diwu\*

State Key Laboratory of Radiation Medicine and Protection, School for Radiological  
and Interdisciplinary Sciences (RAD-X), and Collaborative Innovation Center of  
Radiation Medicine of Jiangsu Higher Education Institutions, Soochow University,  
Suzhou 215123, China

<sup>†</sup> These authors contributed equally.

\* Corresponding e-mail address: diwujuan@suda.edu.cn.

### **Contents:**

|                                                                 |    |
|-----------------------------------------------------------------|----|
| <b>Materials</b> .....                                          | 2  |
| <b>Characterization methods</b> .....                           | 2  |
| <b>Ligand characterization</b> .....                            | 2  |
| <b>Computational details</b> .....                              | 3  |
| <b>Determination of conditional stability constants</b> .....   | 4  |
| <b>Cytotoxicity assays of uranyl and chelating agents</b> ..... | 5  |
| <b>In vivo uranium decorporation assays</b> .....               | 5  |
| <b>Optimized Cartesian Coordinates</b> .....                    | 7  |
| <b>References</b> .....                                         | 14 |

## Materials

Caution!  $^{238}\text{UO}_2(\text{NO}_3)_2 \cdot 6\text{H}_2\text{O}$  is an alpha-emitter, and all relative operations adhered to standard handling procedures for radioactive materials. The ligand 6,6'-[azanediylbis(methylene)] dipicolinic acid (**H<sub>2</sub>dpa**) and picolinic acid (**Pic**) were purchased from Wuxi AppTec and Aladdin Scientific, respectively. All other chemicals were obtained from commercial sources and used without further purification.

## Characterization methods

NMR measurements were conducted at 298 K on an Avance NEO-400 from Bruker. Chemical shifts for  $^1\text{H}$  are reported in ppm on the  $\delta$  scale;  $^1\text{H}$  signals are referenced to the residual solvent peak: dimethyl sulfoxide ( $\text{DMSO-}d_6$ ) (2.500 ppm). Inductively coupled plasma mass spectrometry (ICP-MS) was recorded on Agilent 7900 mass spectrometer. UV-Vis spectra were measured on a Shimadzu UV-2600 spectrophotometer using quartz cuvettes with an optical path length of 1 cm.

## Ligand characterization

The NMR spectra of **H<sub>2</sub>dpa** and **Pic** are consistent with those reported in the previous literature.<sup>1,2</sup>

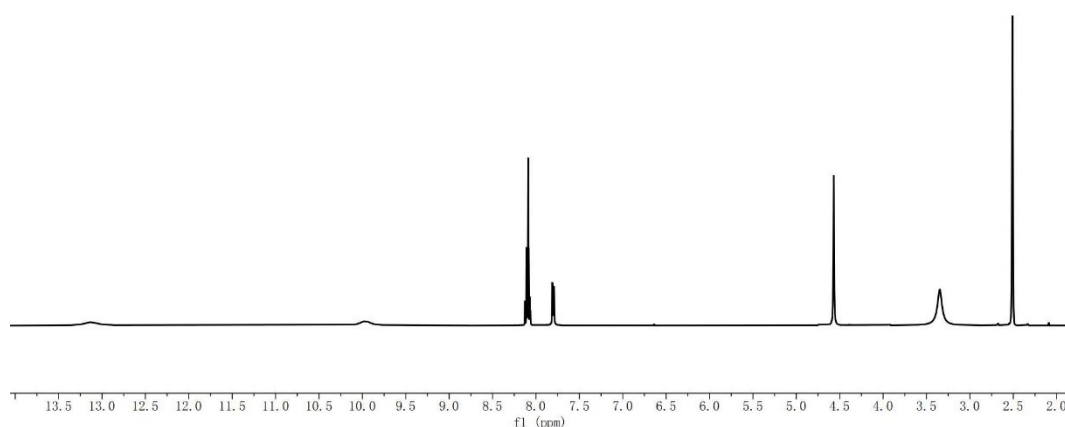

**Figure S1**  $^1\text{H}$  NMR spectrum (400 MHz, 298 K,  $\text{DMSO-}d_6$ ) of **H<sub>2</sub>dpa**.

$^1\text{H}$  NMR (400 MHz,  $\text{DMSO-}d_6$ ):  $\delta$  (ppm) = 8.14 – 8.03 (m, 4H), 7.79 (dd,  $J = 7.0, 1.8$  Hz, 2H), 4.56 (s, 4H).

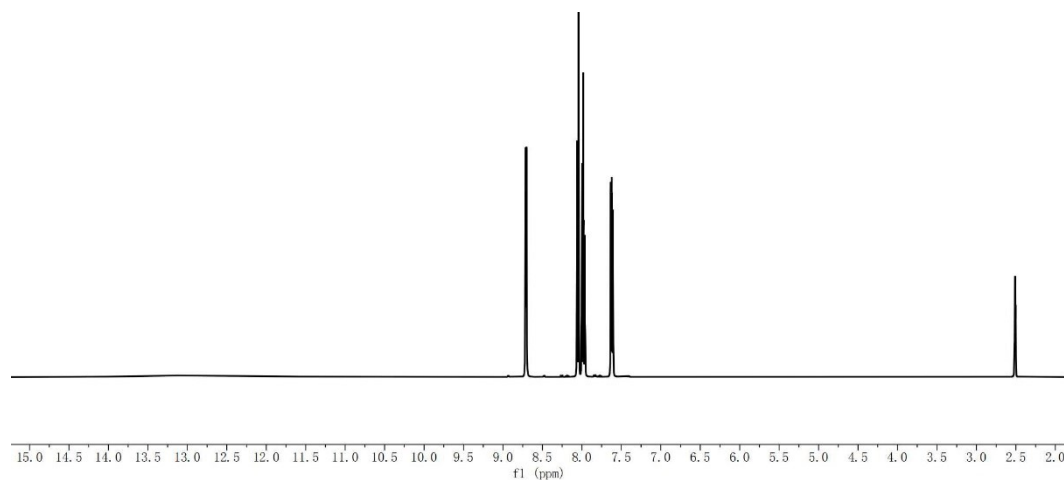

**Figure S2**  $^1\text{H}$  NMR spectrum (400 MHz, 298 K,  $\text{DMSO-}d_6$ ) of Pic.

$^1\text{H}$  NMR (400 MHz,  $\text{DMSO-}d_6$ ):  $\delta$  (ppm) = 8.70 (ddd,  $J = 4.7, 1.7, 0.9$  Hz, 1H), 8.04 (dt,  $J = 7.9, 1.2$  Hz, 1H), 7.97 (td,  $J = 7.7, 1.7$  Hz, 1H), 7.61 (ddd,  $J = 7.5, 4.7, 1.3$  Hz, 1H).

## Computational details

The calculation was performed using the ORCA 5.0.4 program.<sup>3–6</sup> The geometry optimization and frequency calculations were carried out at B3LYP-D3(BJ)/SDD/ma-def2-TZVP(-f) level.<sup>7–11</sup> The Stuttgart/Dresden relativistic effective core potential (SDD, 60 core electrons) and associated valence basis set (32 valence electrons) were applied for the U atom.<sup>12,13</sup> Solvent effects were considered using the Conductor-like Polarizable Continuum Model (CPCM) solvent model.<sup>14</sup> Electronic energies were calculated at PWPB95-D3(BJ)/SARC-DKH-TZVPP/ma-DKH-def2-TZVPP.<sup>15,16</sup> When U was treated with the SARC-DKH-TZVPP basis set, the Coulomb-fitting basis sets employed SARC/J, whereas in other cases the auxiliary basis sets were generated automatically by ORCA for other elements.<sup>17,18</sup> The scalar relativistic effect was considered using the Douglas–Kroll–Hess Hamiltonian of second order (DKH2).<sup>19,20</sup> Gibbs free energy changes ( $\Delta G$ ) of hypothetical complexation reactions were calculated by  $\Delta G = \Sigma G(\text{products}) - \Sigma G(\text{reactants})$ ,  $G = \epsilon_e + \Delta G_{0 \rightarrow T} + \Delta G_{\text{solv}} + 1.89$  kcal/mol.  $\Delta G_{\text{solv}} = E_{\text{soln}} - E_{\text{gas}}$ ,  $E_{\text{soln}}$  and  $E_{\text{gas}}$  are the energies in liquid and gas phases, which is calculated at M06-2X/SDD/6-31G\* level.<sup>21,22</sup> The solvation model based on density (SMD) was used to calculate  $E_{\text{soln}}$ .<sup>23</sup>  $\Delta G_{0 \rightarrow T}$  was calculated using the Shermo application with Grimme's mRRHO model.<sup>24,25</sup> 1.89 kcal/mol is an energy correction term for a

molecule from 1 atm to 1 mol/L. For water, the term for a molecule from 1 atm to liquid (55.6 mol/L) is 4.27 kcal/mol. In cases of multiple **Pic** binding with uranyl, the standard state concentration of **Pic** is 2 mol/L or 3 mol/L. The Gibbs free energy of a proton in aqueous solution, as reported in the literature, is -270.29 kcal/mol (1M).<sup>26,27</sup>

**Table S1** Calculated  $\Delta G$  values of six hypothetical complexation reactions.

| Reactions                                                                                                                                                      | $\Delta G$ (kcal/mol) |
|----------------------------------------------------------------------------------------------------------------------------------------------------------------|-----------------------|
| $2\text{Pic}^- + \text{UO}_2(\text{H}_2\text{O})_5^{2+} \rightarrow \text{UO}_2(\text{Pic})_2(\text{H}_2\text{O}) + 4\text{H}_2\text{O}$ <sup>a</sup>          | -42.17                |
| $3\text{Pic}^- + \text{UO}_2(\text{H}_2\text{O})_5^{2+} \rightarrow \text{UO}_2(\text{Pic})_3^- + 5\text{H}_2\text{O}$ <sup>b</sup>                            | -52.72                |
| $\text{Hdpa}^- + \text{UO}_2(\text{H}_2\text{O})_5^{2+} \rightarrow \text{UO}_2\text{dpa} + 5\text{H}_2\text{O} + \text{H}^+$ <sup>c</sup>                     | -59.59                |
| $\text{dpa}^{2-} + \text{UO}_2(\text{H}_2\text{O})_5^{2+} \rightarrow \text{UO}_2\text{dpa} + 5\text{H}_2\text{O}$ <sup>c</sup>                                | -60.35                |
| $\text{Hdpa}^- + \text{UO}_2(\text{H}_2\text{O})_5^{2+} \rightarrow \text{UO}_2\text{dpa}(\text{H}_2\text{O}) + 4\text{H}_2\text{O} + \text{H}^+$ <sup>d</sup> | -54.12                |
| $\text{dpa}^{2-} + \text{UO}_2(\text{H}_2\text{O})_5^{2+} \rightarrow \text{UO}_2\text{dpa}(\text{H}_2\text{O}) + 4\text{H}_2\text{O}$ <sup>d</sup>            | -54.88                |

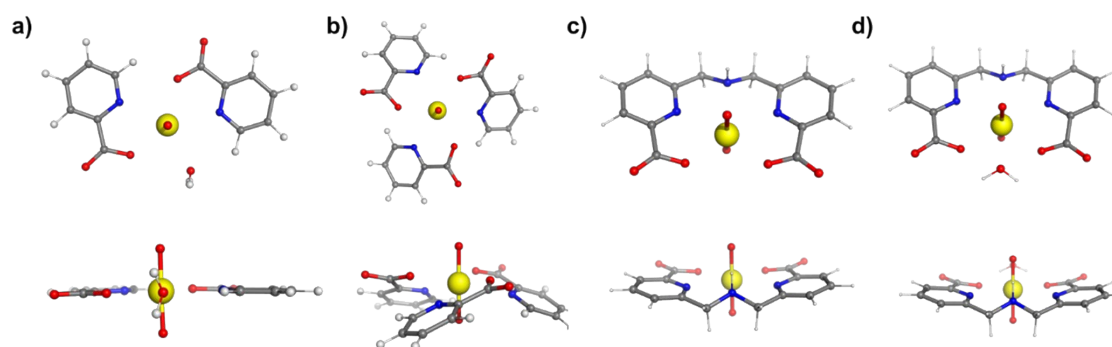

**Figure S3** Top and side views of optimized structures of a)  $\text{UO}_2(\text{Pic})_2(\text{H}_2\text{O})$ , b)  $\text{UO}_2(\text{Pic})_3^-$ , c)  $\text{UO}_2\text{dpa}$ , and d)  $\text{UO}_2\text{dpa}(\text{H}_2\text{O})$ .

## Determination of conditional stability constants

Determined by Job's plot analysis, the metal-ligand stoichiometry of uranyl complexes herein is 1:1 for  $\text{H}_2\text{dpa}$ . The calculation of the conditional binding constant was treated and fitted based on spectrophotometric titration data with the HypSpec program.<sup>28</sup> Titration data ranging from 260 to 375 nm were employed to refine the conditional stability constant.

## Cytotoxicity assays of uranyl and chelating agents

Cells in log phase were cultured in a 96-well plate for 24 h at a seeding density of 3000 cells per well in 0.1 mL of DMEM/F-12, and 0.1 mL culture medium contained 12.4  $\mu\text{M}$  U(VI) and different concentrations of chelating agents. After 48 h, 10.0  $\mu\text{L}$  of CCK-8 was added to every well, and the cells were cultured for 1–2 h. The absorbance spectrum of every well was obtained by a Synergy Neo Multi-Mode Reader (BioTek). The cell survival rate was calculated using the formula:  $[\text{OD}(\text{experimental group}) - \text{OD}(\text{blank})] / [\text{OD}(\text{control group}) - \text{OD}(\text{blank})] \times 100\%$ . Each group of the above assays was performed with six parallel samples. In this assay, only the culture medium was added to the wells of the control group.

**Table S2** Dosage-dependent cell growth rate of NRK-52E cells treated with 12.4  $\mu\text{M}$  U(VI) + ZnNa<sub>3</sub>DTPA, 12.4  $\mu\text{M}$  U(VI) + Pic and 12.4  $\mu\text{M}$  U(VI) + H<sub>2</sub>dpa.

| Concentration ( $\mu\text{M}$ ) | U(VI) + ZnNa <sub>3</sub> DTPA Survival Rate (%) | U(VI) + Pic Survival Rate (%) | U(VI) + H <sub>2</sub> dpa Survival Rate (%) |
|---------------------------------|--------------------------------------------------|-------------------------------|----------------------------------------------|
| 50                              | 85.36%±11.92%                                    | 95.17%±3.58%                  | 92.64%±14.04%                                |
| 100                             | 83.18%±16.13%                                    | 96.37%±5.50%                  | 89.24%±16.52%                                |
| 200                             | 84.37%±14.34%                                    | 94.60%±4.95%                  | 81.99%±14.18%                                |
| 400                             | 87.28%±17.26%                                    | 92.40%±5.65%                  | 66.18%±16.10%                                |

## In vivo uranium decorporation assays

Female Balb/c mice (6-8 weeks old) were obtained for the in vivo uranium decorporation assays. These animal assays were approved by the Animal Care and Use Committee of Soochow University.

U(VI) stock solution ( $\text{UO}_2(\text{NO}_3)_2 \cdot 6\text{H}_2\text{O}$ ) was prepared in normal saline (NS); the ligand Pic, H<sub>2</sub>dpa or ZnNa<sub>3</sub>DTPA was dissolved in 5.000 mL NS, respectively, to prepare the ligand solution with the additional NaOH as a base to adjust the pH value to 7-8.

Experimental and control groups of five mice each were intravenously (i.v.) injected with 0.2 mL <sup>238</sup>U(VI) solution as the standard dosage (0.5 mg <sup>238</sup>U(VI) kg<sup>-1</sup>). For the experimental groups, 0.5 mL ligand solution (molar ratio of ligands to U(VI) = 92:1 for H<sub>2</sub>dpa and 184:1 for Pic) was administered by intraperitoneal (i.p.) injection promptly

after, while the control group was only given 0.5 mL saline. All mice were fed water and food 4 h after  $^{238}\text{U}$  injection. Mice were dissected to obtain kidney, femur, liver, spleen, and muscle samples 24 h after the initial injection of U(VI) solution. The tissue samples were digested in aqua regia, and the  $^{238}\text{U}$  content in each sample was determined by ICP-MS (Agilent).

**Table S3** The uranium removal efficiency of **Pic** and **H<sub>2</sub>dpa** with single dosage prompt injection, all values reported as  $\mu\text{g}$  (U) per g (tissue).

| Tissue Type             | U(VI) + NS        | U(VI) + <b>Pic</b> | U(VI) + <b>H<sub>2</sub>dpa</b> |
|-------------------------|-------------------|--------------------|---------------------------------|
| Kidneys                 | 7.165 $\pm$ 2.415 | 8.231 $\pm$ 1.344  | 0.622 $\pm$ 0.113               |
| Femurs                  | 1.465 $\pm$ 0.232 | 1.327 $\pm$ 0.207  | 1.382 $\pm$ 0.178               |
| Liver & Spleen & Muscle | 0.030 $\pm$ 0.019 | 0.037 $\pm$ 0.015  | 0.027 $\pm$ 0.010               |

Another experimental assay using the above-mentioned procedures was conducted to compare the in vivo removal efficiency of the clinical drug  $\text{ZnNa}_3\text{DTPA}$  with that of **H<sub>2</sub>dpa**. For the experimental groups, 0.5 mL ligand solution (molar ratio of ligands to U(VI) = 184:1) was administered by intraperitoneal (i.p.) injection, while the control group was only given 0.5 mL saline.

**Table S4** The uranium removal efficiency of  $\text{ZnNa}_3\text{DTPA}$  and **H<sub>2</sub>dpa** with single dosage prompt injection, all values reported as  $\mu\text{g}$  (U) per g (tissue).

| Tissue Type             | U(VI) + NS         | $\text{ZnNa}_3\text{DTPA}$ | U(VI) + <b>H<sub>2</sub>dpa</b> |
|-------------------------|--------------------|----------------------------|---------------------------------|
| Kidneys                 | 12.331 $\pm$ 2.268 | 9.230 $\pm$ 1.029          | 0.879 $\pm$ 0.244               |
| Femurs                  | 2.624 $\pm$ 0.499  | 2.878 $\pm$ 0.863          | 2.373 $\pm$ 0.375               |
| Liver & Spleen & Muscle | 0.079 $\pm$ 0.048  | 0.037 $\pm$ 0.013          | 0.086 $\pm$ 0.014               |

## Optimized Cartesian Coordinates

UO<sub>2</sub>dpa

|   |           |           |           |
|---|-----------|-----------|-----------|
| C | -3.698747 | 2.487428  | -0.152463 |
| C | -4.804129 | 1.668668  | -0.326074 |
| C | -4.639099 | 0.288125  | -0.321042 |
| C | -3.364135 | -0.220797 | -0.155415 |
| N | -2.296414 | 0.577692  | 0.002272  |
| C | -2.447660 | 1.904916  | 0.020405  |
| C | -1.217752 | 2.713997  | 0.306954  |
| N | -0.000502 | 2.039592  | -0.191611 |
| C | 1.217444  | 2.713655  | 0.305641  |
| C | 2.447074  | 1.904244  | 0.018522  |
| C | 3.697910  | 2.486846  | -0.155950 |
| N | 2.296231  | 0.576908  | 0.002585  |
| C | 3.364270  | -0.221447 | -0.154063 |
| C | 4.638969  | 0.287633  | -0.321217 |
| C | 4.803471  | 1.668206  | -0.328891 |
| C | -3.068809 | -1.701762 | -0.120606 |
| C | 3.069747  | -1.702449 | -0.115304 |
| O | 1.818141  | -1.980380 | 0.062553  |
| O | -1.817166 | -1.979900 | 0.057135  |
| U | 0.001005  | -0.545746 | 0.063134  |
| H | -3.795162 | 3.564285  | -0.147855 |
| H | -5.786204 | 2.101145  | -0.463009 |
| H | -5.472609 | -0.387232 | -0.444433 |
| H | 3.794014  | 3.563738  | -0.152918 |
| H | 5.472699  | -0.387640 | -0.443577 |
| H | 5.785334  | 2.100802  | -0.466966 |
| O | 3.970443  | -2.524876 | -0.235098 |
| O | -3.969144 | -2.524196 | -0.242978 |
| H | -0.001014 | 2.116460  | -1.207136 |

|   |           |           |           |
|---|-----------|-----------|-----------|
| H | 1.312128  | 3.718316  | -0.110426 |
| H | -1.312527 | 3.718859  | -0.108606 |
| O | 0.003936  | -0.552770 | -1.720783 |
| O | -0.001872 | -0.411313 | 1.843241  |
| H | -1.120421 | 2.812391  | 1.390932  |
| H | 1.121035  | 2.812601  | 1.389654  |

**UO<sub>2</sub>dpa(H<sub>2</sub>O)**

|   |            |           |           |
|---|------------|-----------|-----------|
| C | -13.314971 | -1.394263 | 0.990878  |
| C | -14.471752 | -1.926680 | 0.445271  |
| C | -14.403328 | -3.142720 | -0.222825 |
| C | -13.173198 | -3.765072 | -0.335826 |
| N | -12.047544 | -3.234901 | 0.166348  |
| C | -12.116183 | -2.083706 | 0.839815  |
| C | -10.851981 | -1.624977 | 1.487339  |
| N | -9.675241  | -2.018456 | 0.693117  |
| C | -8.451768  | -1.695692 | 1.447584  |
| C | -7.238220  | -2.223477 | 0.757429  |
| C | -5.997892  | -1.603684 | 0.869875  |
| N | -7.394642  | -3.366332 | 0.084629  |
| C | -6.318438  | -3.956973 | -0.456842 |
| C | -5.051623  | -3.406378 | -0.382688 |
| C | -4.891827  | -2.199137 | 0.285699  |
| C | -13.002002 | -5.112591 | -0.982044 |
| C | -6.586919  | -5.287476 | -1.104973 |
| O | -7.815445  | -5.660543 | -1.022408 |
| O | -11.794046 | -5.552545 | -0.938457 |
| U | -9.763876  | -4.405896 | -0.462918 |
| H | -13.329044 | -0.458685 | 1.532482  |
| H | -15.415033 | -1.406712 | 0.545813  |
| H | -15.277672 | -3.612434 | -0.647993 |
| H | -5.913157  | -0.672291 | 1.412372  |



|   |            |           |           |
|---|------------|-----------|-----------|
| H | -4.220009  | -3.923376 | -0.837657 |
| H | -3.917576  | -1.734291 | 0.356404  |
| O | -5.678021  | -5.928440 | -1.628730 |
| O | -13.962982 | -5.706383 | -1.467202 |
| H | -9.672329  | -1.447326 | -0.150175 |
| H | -8.363436  | -0.621069 | 1.620649  |
| H | -10.872246 | -0.546780 | 1.659720  |
| O | -9.764769  | -3.448609 | -1.964307 |
| O | -9.755764  | -5.190581 | 1.135552  |
| H | -10.771518 | -2.112540 | 2.462328  |
| H | -8.527264  | -2.181244 | 2.423883  |
| O | -9.848241  | -6.342888 | -2.390497 |
| H | -10.625955 | -6.875480 | -2.172394 |
| H | -9.061973  | -6.875983 | -2.204268 |

**Hdpa<sup>-</sup>**

|   |           |           |           |
|---|-----------|-----------|-----------|
| C | 0.797834  | -2.250906 | -0.568458 |
| C | 2.047675  | -1.698265 | -0.337622 |
| C | 2.209259  | -0.807523 | 0.715271  |
| C | 1.122471  | -0.519100 | 1.535667  |
| N | -0.074164 | -1.078456 | 1.322365  |
| C | -0.235724 | -1.895640 | 0.287788  |
| C | -1.843707 | 1.711564  | 0.416859  |
| C | -2.057835 | 0.613381  | -0.407616 |
| N | -1.290884 | 0.336399  | -1.464203 |
| C | -0.227906 | 1.107189  | -1.708902 |
| C | 0.074508  | 2.212151  | -0.912201 |
| C | -0.756715 | 2.531220  | 0.149471  |
| C | -1.634290 | -2.428085 | 0.085776  |
| N | -2.621107 | -1.515946 | 0.750288  |
| C | -3.144757 | -0.376257 | -0.096080 |
| C | 1.259737  | 0.465101  | 2.703787  |

|   |           |           |           |
|---|-----------|-----------|-----------|
| O | 2.279009  | 1.201672  | 2.680519  |
| O | 0.357364  | 0.453653  | 3.574134  |
| C | 0.680281  | 0.733762  | -2.889741 |
| O | 0.220954  | -0.058582 | -3.746100 |
| O | 1.820177  | 1.265942  | -2.887901 |
| H | 0.618441  | -2.918010 | -1.400834 |
| H | 2.880211  | -1.939959 | -0.985450 |
| H | 3.157091  | -0.327735 | 0.904734  |
| H | -2.500859 | 1.902973  | 1.254601  |
| H | 0.950675  | 2.800965  | -1.136767 |
| H | -0.552630 | 3.393128  | 0.771271  |
| H | -1.743986 | -3.405615 | 0.554809  |
| H | -1.887823 | -2.512306 | -0.966818 |
| H | -2.122190 | -1.127331 | 1.566809  |
| H | -3.413783 | -2.058523 | 1.092389  |
| H | -3.548380 | -0.820324 | -1.002019 |
| H | -3.943920 | 0.080018  | 0.482648  |

**dpa<sup>2-</sup>**

|   |           |           |           |
|---|-----------|-----------|-----------|
| C | -0.627962 | -0.292008 | -1.791477 |
| C | 0.535349  | -1.037489 | -1.725350 |
| C | 0.580704  | -2.134977 | -0.875240 |
| C | -0.549620 | -2.464101 | -0.133561 |
| N | -1.677191 | -1.744377 | -0.210530 |
| C | -1.715108 | -0.671073 | -1.003694 |
| C | -2.982170 | 0.159657  | -0.978016 |
| N | -2.871117 | 1.488809  | -0.362244 |
| C | -2.300711 | 1.495281  | 0.990039  |
| C | -0.788003 | 1.415042  | 1.040394  |
| C | -0.122463 | 0.449558  | 1.788424  |
| N | -0.135692 | 2.326287  | 0.312058  |
| C | 1.200001  | 2.316399  | 0.291023  |

|   |           |           |           |
|---|-----------|-----------|-----------|
| C | 1.937946  | 1.378375  | 1.012676  |
| C | 1.264248  | 0.429689  | 1.766619  |
| C | -0.520407 | -3.666104 | 0.823615  |
| C | 1.922172  | 3.365940  | -0.566488 |
| O | 3.141288  | 3.543481  | -0.304861 |
| O | 0.605559  | -4.203902 | 0.997313  |
| H | -0.695993 | 0.583911  | -2.423383 |
| H | 1.399331  | -0.764241 | -2.317959 |
| H | 1.473499  | -2.732844 | -0.775357 |
| H | -0.683675 | -0.284739 | 2.349686  |
| H | 3.016280  | 1.402098  | 0.968278  |
| H | 1.810767  | -0.322586 | 2.321440  |
| O | 1.256451  | 3.950814  | -1.455645 |
| O | -1.601352 | -4.014908 | 1.358106  |
| H | -2.303775 | 2.093153  | -0.947853 |
| H | -2.603978 | 2.425278  | 1.479311  |
| H | -3.342107 | 0.310074  | -1.997940 |
| H | -3.739044 | -0.408417 | -0.435373 |
| H | -2.736235 | 0.672797  | 1.557962  |

**UO<sub>2</sub>(Pic)<sub>2</sub>(H<sub>2</sub>O)**

|   |           |            |           |
|---|-----------|------------|-----------|
| C | 10.490999 | -13.190205 | 1.551682  |
| C | 9.290709  | -12.809808 | 2.127576  |
| C | 8.703433  | -11.617584 | 1.725316  |
| C | 9.339861  | -10.849500 | 0.761212  |
| C | 10.541486 | -11.296164 | 0.230337  |
| N | 11.107478 | -12.444823 | 0.617077  |
| C | 11.186790 | -14.472137 | 1.936903  |
| O | 12.295805 | -14.677520 | 1.306363  |
| O | 10.702363 | -15.220230 | 2.779565  |
| C | 15.038408 | -11.676762 | -2.742168 |
| C | 15.929007 | -11.258535 | -3.716969 |

|   |           |            |           |
|---|-----------|------------|-----------|
| C | 17.049378 | -12.035978 | -3.978082 |
| C | 17.236866 | -13.203753 | -3.253264 |
| C | 16.298860 | -13.557050 | -2.293507 |
| N | 15.219156 | -12.809486 | -2.040925 |
| C | 13.801252 | -10.882765 | -2.404177 |
| O | 13.082261 | -11.405251 | -1.464305 |
| O | 13.542905 | -9.839886  | -2.993770 |
| U | 13.341346 | -13.379159 | -0.302606 |
| O | 14.928242 | -15.287862 | -0.071187 |
| H | 8.838112  | -13.445699 | 2.873898  |
| H | 7.765524  | -11.294853 | 2.157213  |
| H | 8.918975  | -9.915106  | 0.417685  |
| H | 11.073881 | -10.733287 | -0.522518 |
| H | 15.734650 | -10.340599 | -4.251563 |
| H | 17.762676 | -11.735275 | -4.733841 |
| H | 18.094312 | -13.840027 | -3.421713 |
| H | 16.407968 | -14.458882 | -1.709227 |
| H | 14.684759 | -16.169682 | -0.389146 |
| H | 15.424101 | -15.416262 | 0.750785  |
| O | 14.245404 | -12.521198 | 0.967445  |
| O | 12.490562 | -14.262884 | -1.592218 |

**UO<sub>2</sub>(Pic)<sub>3</sub><sup>-</sup>**

|   |           |          |           |
|---|-----------|----------|-----------|
| C | -1.087823 | 3.300813 | 0.284682  |
| C | -1.232423 | 4.625512 | -0.102843 |
| C | -0.152202 | 5.269811 | -0.688375 |
| C | 1.030726  | 4.564138 | -0.863041 |
| C | 1.094124  | 3.245051 | -0.435759 |
| N | 0.057060  | 2.624787 | 0.131016  |
| C | -2.223448 | 2.517219 | 0.890010  |
| O | -1.957461 | 1.284358 | 1.118554  |
| O | -3.304499 | 3.066790 | 1.117831  |

|   |           |           |           |
|---|-----------|-----------|-----------|
| C | -2.323027 | -2.651137 | 0.257993  |
| C | -3.384328 | -3.447642 | -0.148050 |
| C | -4.491567 | -2.840689 | -0.722919 |
| C | -4.494475 | -1.460033 | -0.867950 |
| C | -3.396368 | -0.736372 | -0.423936 |
| N | -2.331058 | -1.318156 | 0.131936  |
| C | -1.069265 | -3.236618 | 0.854454  |
| O | -0.147137 | -2.381368 | 1.100329  |
| O | -0.988275 | -4.450796 | 1.060144  |
| C | 3.426700  | -0.719752 | 0.293197  |
| C | 4.651951  | -1.235905 | -0.104660 |
| C | 4.682037  | -2.475231 | -0.727574 |
| C | 3.485534  | -3.150669 | -0.927443 |
| C | 2.305033  | -2.568175 | -0.487513 |
| N | 2.274674  | -1.377363 | 0.114668  |
| C | 3.301778  | 0.635996  | 0.939038  |
| O | 2.096626  | 1.008770  | 1.164526  |
| O | 4.312237  | 1.295061  | 1.199249  |
| U | -0.007648 | -0.030823 | 0.757263  |
| H | -2.178614 | 5.122484  | 0.052555  |
| H | -0.231913 | 6.301275  | -1.005568 |
| H | 1.896970  | 5.022420  | -1.319727 |
| H | 1.999966  | 2.667149  | -0.540903 |
| H | -3.324253 | -4.517661 | -0.014860 |
| H | -5.334418 | -3.432892 | -1.054181 |
| H | -5.332397 | -0.943032 | -1.314672 |
| H | -3.366746 | 0.339657  | -0.505205 |
| H | 5.550553  | -0.663485 | 0.071791  |
| H | 5.619942  | -2.904768 | -1.054226 |
| H | 3.459006  | -4.116165 | -1.413313 |
| H | 1.355979  | -3.067732 | -0.611319 |
| O | -0.021147 | -0.045379 | 2.543535  |

O -0.006568 -0.023255 -1.028732

#### Pic<sup>-</sup>

C -24.150010 -2.967864 2.991676

C -24.158280 -2.744014 4.368892

C -23.423994 -3.577139 5.199961

C -22.711154 -4.624845 4.632667

C -22.764384 -4.781788 3.253147

N -23.455926 -3.975168 2.444552

C -24.949888 -2.039514 2.063200

O -24.715430 -2.102395 0.832374

O -25.779184 -1.280750 2.630576

H -24.736495 -1.922903 4.764716

H -23.410333 -3.414117 6.270284

H -22.127264 -5.305371 5.237800

H -22.223289 -5.592323 2.776078

## References

- 1 A. T. Murray, P. Matton, N. W. G. Fairhurst, M. P. John and D. R. Carbery, *Org. Lett.*, 2012, **14**, 3656–3659.
- 2 F. Chen, M. Bai, W. Liu, H. Kong, T. Zhang, H. Yao, E. Zhang, J. Du and S. Qin, *Eur. J. Med. Chem.*, 2021, **224**, 113702.
- 3 F. Neese, F. Wennmohs, U. Becker and C. Riplinger, *J. Chem. Phys.*, 2020, **152**, 224108.
- 4 F. Neese, *WIREs Comput. Mol. Sci.*, 2012, **2**, 73–78.
- 5 F. Neese, *WIREs Comput. Mol. Sci.*, 2018, **8**, e1327.
- 6 F. Neese, *WIREs Comput. Mol. Sci.*, 2022, **12**, e1606.
- 7 S. Grimme, S. Ehrlich and L. Goerigk, *J. Comput. Chem.*, 2011, **32**, 1456–1465.
- 8 S. Grimme, J. Antony, S. Ehrlich and H. Krieg, *J. Chem. Phys.*, 2010, **132**, 154104.
- 9 P. J. Stephens, F. J. Devlin, C. F. Chabalowski and M. J. Frisch, *J Phys Chem*, 1994, **98**, 11623–11627.
- 10 F. Weigend and R. Ahlrichs, *Phys. Chem. Chem. Phys. PCCP*, 2005, **7**, 3297.
- 11 J. Zheng, X. Xu and D. G. Truhlar, *Theor. Chem. Acc.*, 2011, **128**, 295–305.
- 12 W. Küchle, M. Dolg, H. Stoll and H. Preuss, *J. Chem. Phys.*, 1994, **100**, 7535–7542.
- 13 X. Cao and M. Dolg, *J. Mol. Struct. THEOCHEM*, 2004, **673**, 203–209.
- 14 V. Barone and M. Cossi, *J. Phys. Chem. A*, 1998, **102**, 1995–2001.

- 15 L. Goerigk and S. Grimme, *J. Chem. Theory Comput.*, 2011, **7**, 291–309.
- 16 D. A. Pantazis and F. Neese, *J. Chem. Theory Comput.*, 2011, **7**, 677–684.
- 17 F. Neese, F. Wennmohs, A. Hansen and U. Becker, *Chem. Phys.*, 2009, **356**, 98–109.
- 18 G. L. Stoychev, A. A. Auer and F. Neese, *J. Chem. Theory Comput.*, 2017, **13**, 554–562.
- 19 G. Jansen and B. A. Hess, *Phys. Rev. A*, 1989, **39**, 6016–6017.
- 20 B. A. Hess, *Phys. Rev. A*, 1986, **33**, 3742–3748.
- 21 Y. Zhao and D. G. Truhlar, *Theor. Chem. Acc.*, 2008, **120**, 215–241.
- 22 W. J. Hehre, R. Ditchfield and J. A. Pople, *J. Chem. Phys.*, 1972, **56**, 2257–2261.
- 23 A. V. Marenich, C. J. Cramer and D. G. Truhlar, *J. Phys. Chem. B*, 2009, **113**, 6378–6396.
- 24 T. Lu and Q. Chen, *Comput. Theor. Chem.*, 2021, **1200**, 113249.
- 25 S. Grimme, *Chem. Eur. J.*, 2012, **18**, 9955–9964.
- 26 C. P. Kelly, C. J. Cramer and D. G. Truhlar, *J. Phys. Chem. B*, 2006, **110**, 16066–16081.
- 27 J. J. Fifen, Z. Dhaouadi and M. Nsangou, *J. Phys. Chem. A*, 2014, **118**, 11090–11097.
- 28 P. Gans, A. Sabatini and A. Vacca, *Talanta*, 1996, **43**, 1739–1753.
